# Supplementary material for: Real-World Clinical Data of Palbociclib in Asian Metastatic Breast Cancer Patients: Experiences from Eight Institutions
Source: PubMed Central journal article supplement — Cancer Res Treat. 2020 Oct 28;53(2):409–23. doi: 10.4143/crt.2020.451 (PMC8053880; doi:10.4143/crt.2020.451), 2020-10-28
Supplement: crt-2020-451_S2Table.pdf [file crt-2020-451_S2Table.pdf]

**S2 Table.** Dose reduction of palbociclib in patient population

|                              | Letrozole+palbociclib<br>(n=145) | Fulvestrant+palbociclib<br>(n=24) |
|------------------------------|----------------------------------|-----------------------------------|
| Initial start dose           |                                  |                                   |
| 125 mg                       | 131 (90.3)                       | 19 (79.2)                         |
| 100 mg                       | 12 (8.3)                         | 5 (20.8)                          |
| 75 mg                        | 2 (1.4)                          | 0                                 |
| Dose reduction               |                                  |                                   |
| 1st reduction                | 74 (51.0)                        | 17 (70.8)                         |
| Median                       | 3 cycles                         | 2 cycles                          |
| Reason for reduction         |                                  |                                   |
| Delayed bone marrow recovery | 53 (71.6)                        | 12 (70.6)                         |
| Nausea                       | 9 (12.2)                         | 1 (5.9)                           |
| Fatigue                      | 25 (33.8)                        | 6 (35.3)                          |
| Others                       | 6 (8.1)                          | 2 (11.8)                          |
| 2nd reduction                | 16                               | 2                                 |
| Median                       | 7 cycles                         | 7 cycles                          |
| Reason for reduction         |                                  |                                   |
| Delayed bone marrow recovery | 11 (68.8)                        | 2 (100)                           |
| Nausea                       | 2 (12.5)                         | 0                                 |
| Fatigue                      | 5 (31.3)                         | 0                                 |
| Others                       | 1 (6.3)                          | 0                                 |

Values are presented as number (%) unless otherwise indicated.
